# Supplementary material
Source: PubMed Central journal article supplement (PMC7384957)

A

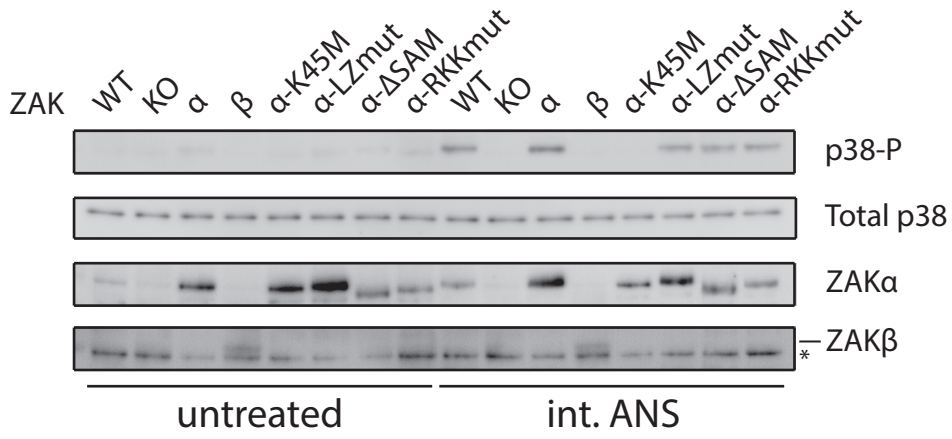

B

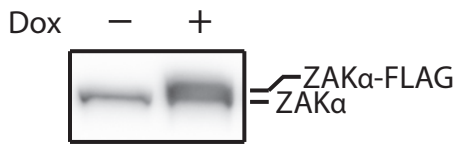

C

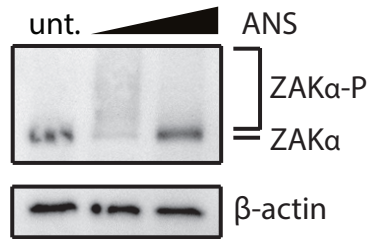

D

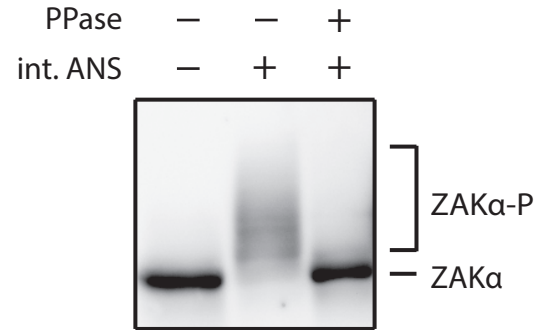

Figure S2

Supplement: NIHMS1602553-supplement-2.pdf [file NIHMS1602553-supplement-2.pdf]

**A**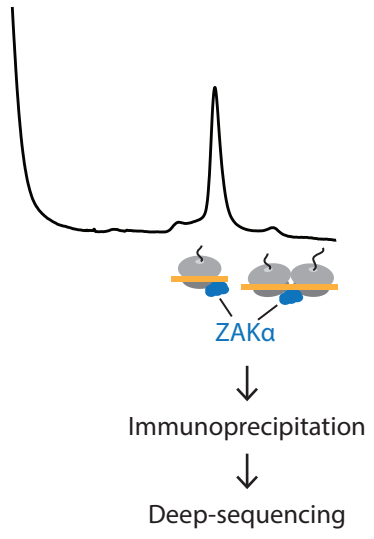**B**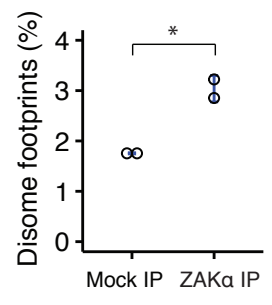**C**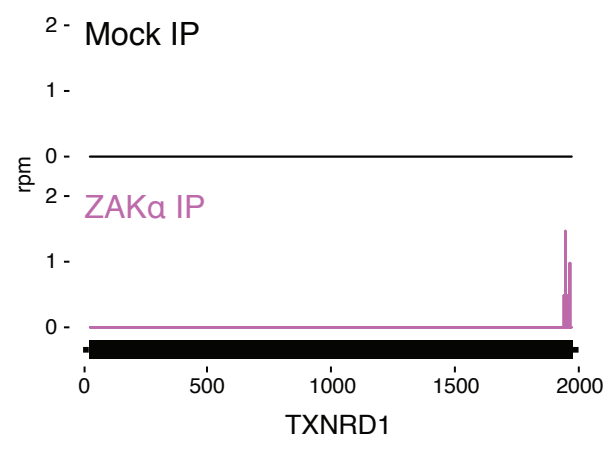**D**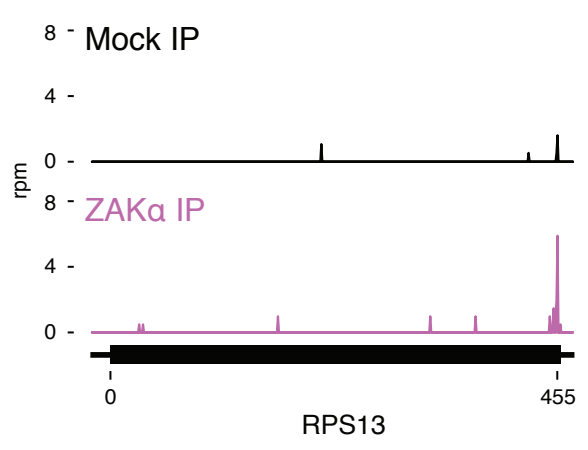**E**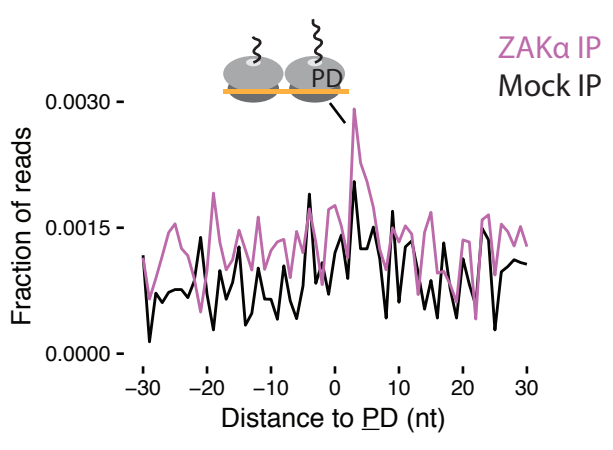**F**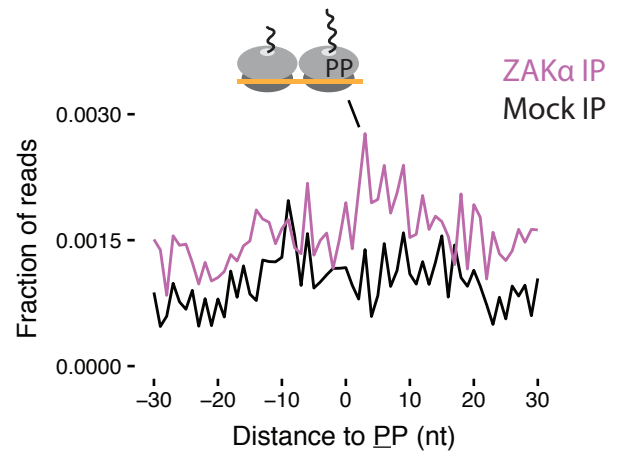

Figure S3

Supplement: NIHMS1602553-supplement-3.pdf [file NIHMS1602553-supplement-3.pdf]

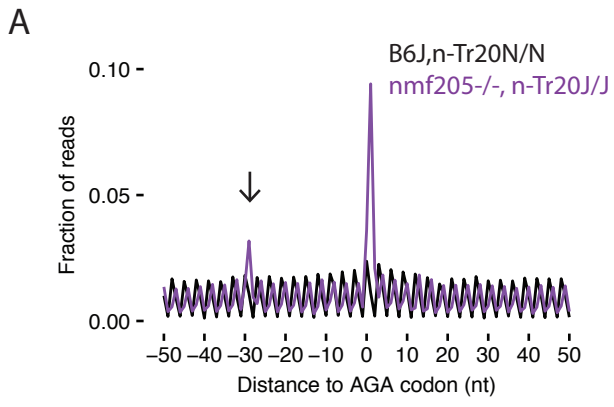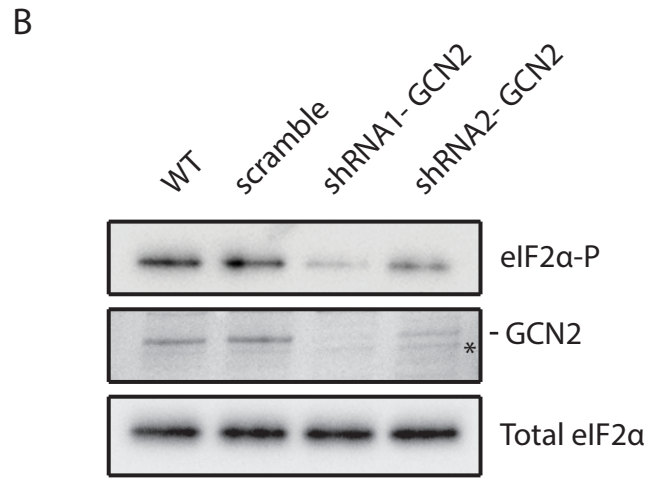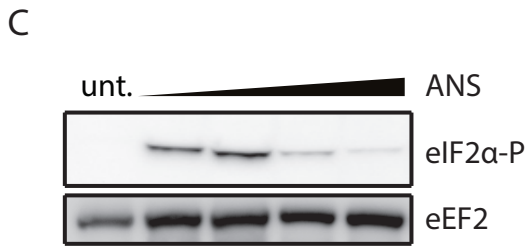

Figure S4

Supplement: NIHMS1602553-supplement-4.pdf [file NIHMS1602553-supplement-4.pdf]

A

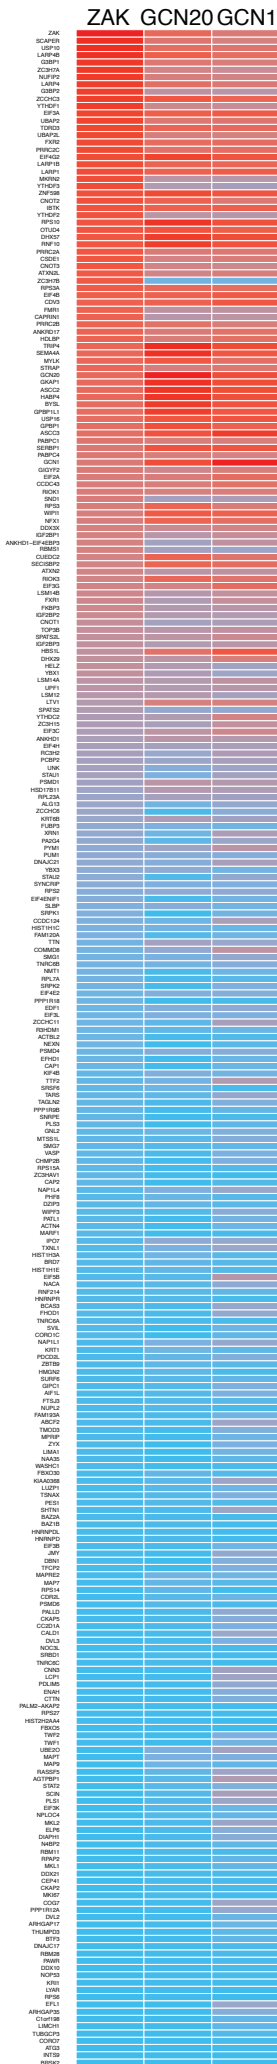

B

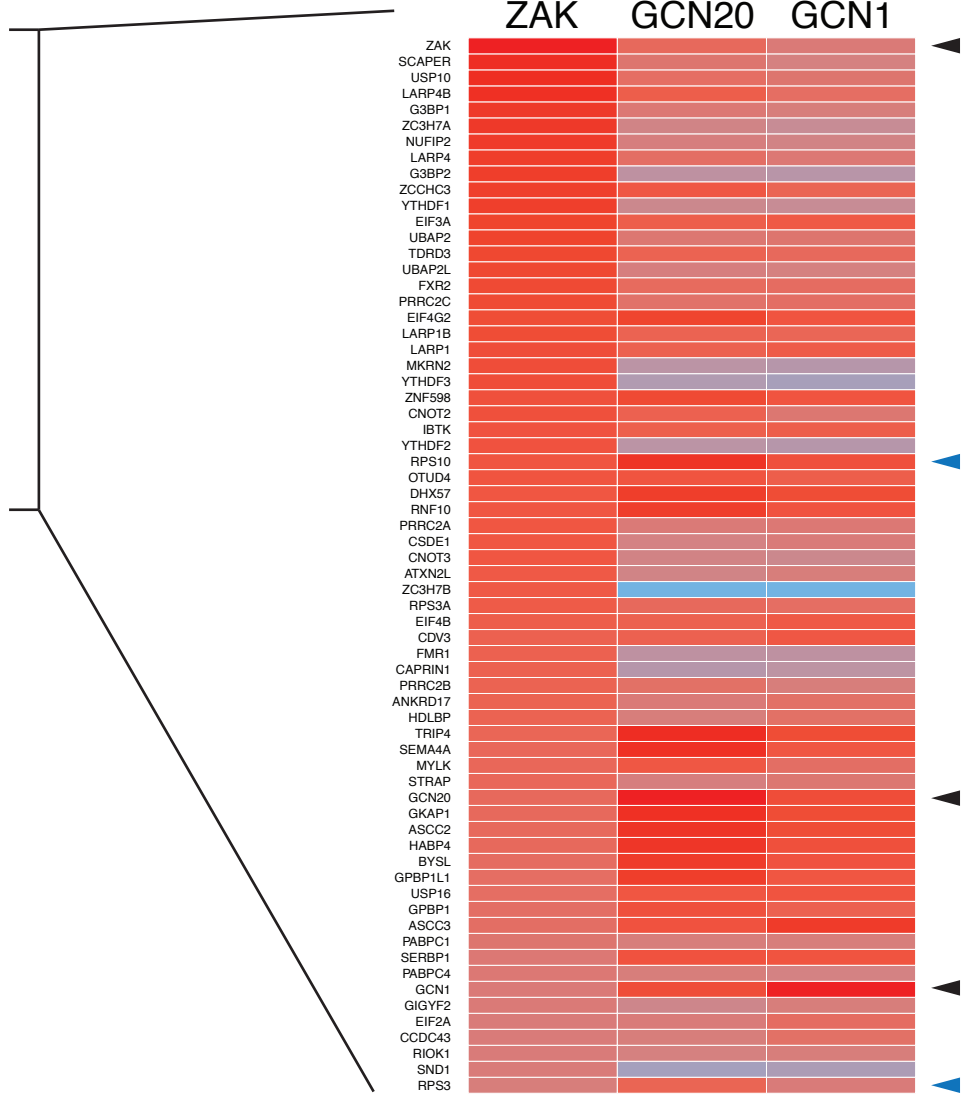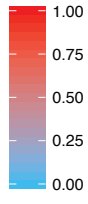

Figure S5

Supplement: NIHMS1602553-supplement-5.pdf [file NIHMS1602553-supplement-5.pdf]

A

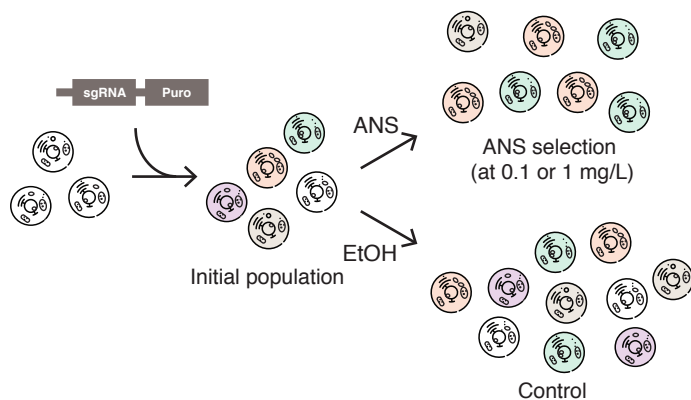

B

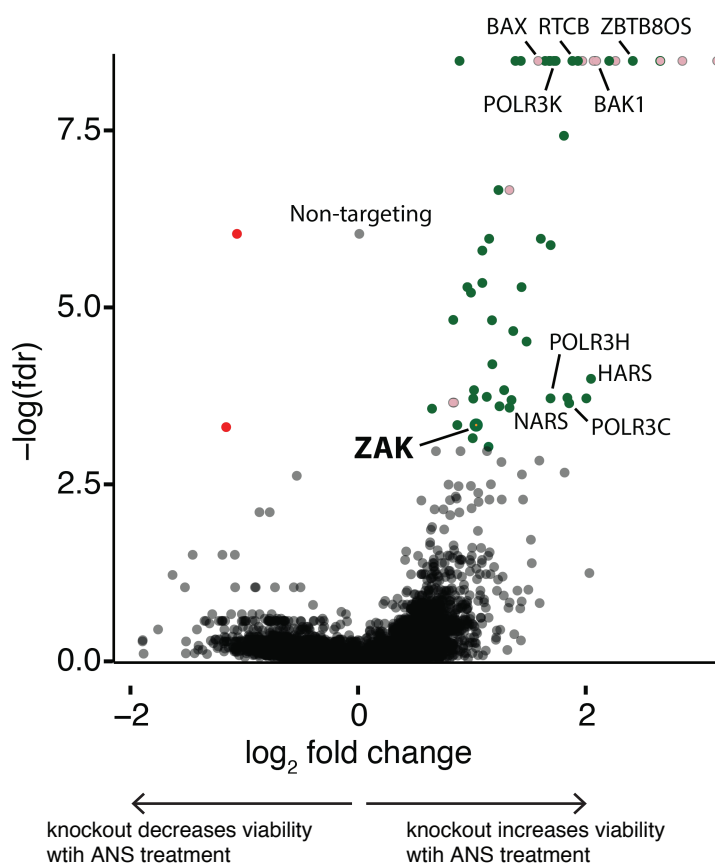

C

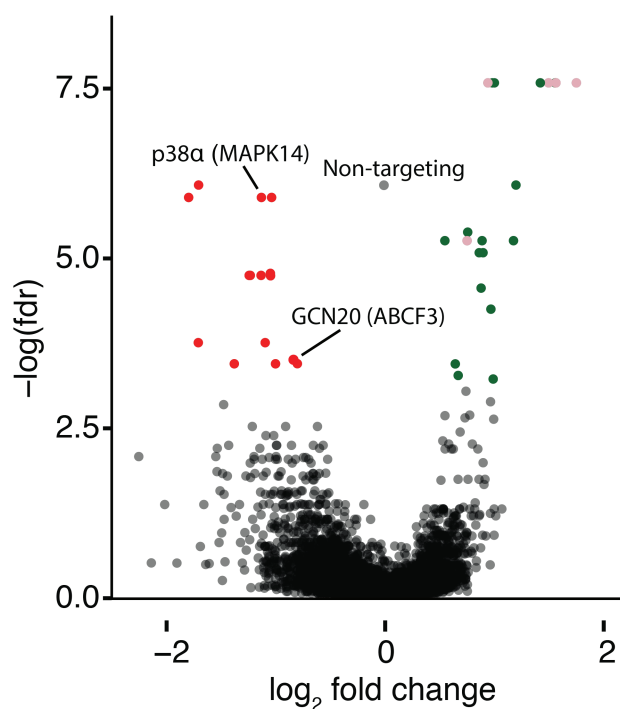

D

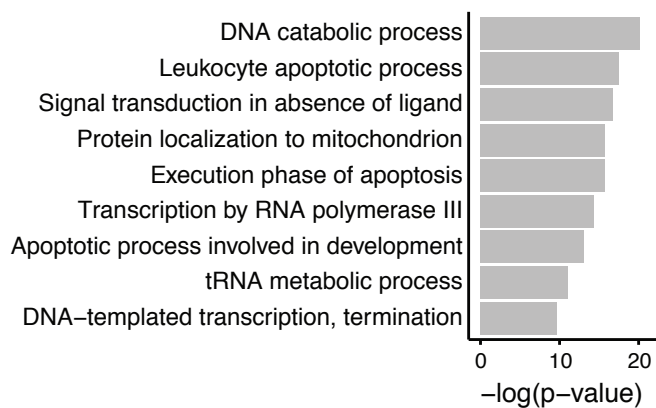

E

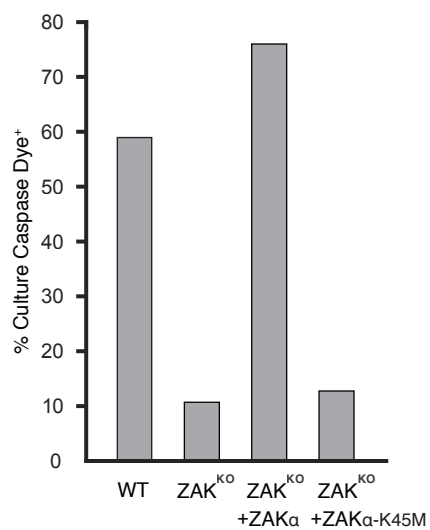

Figure S6

Supplement: NIHMS1602553-supplement-6.pdf [file NIHMS1602553-supplement-6.pdf]

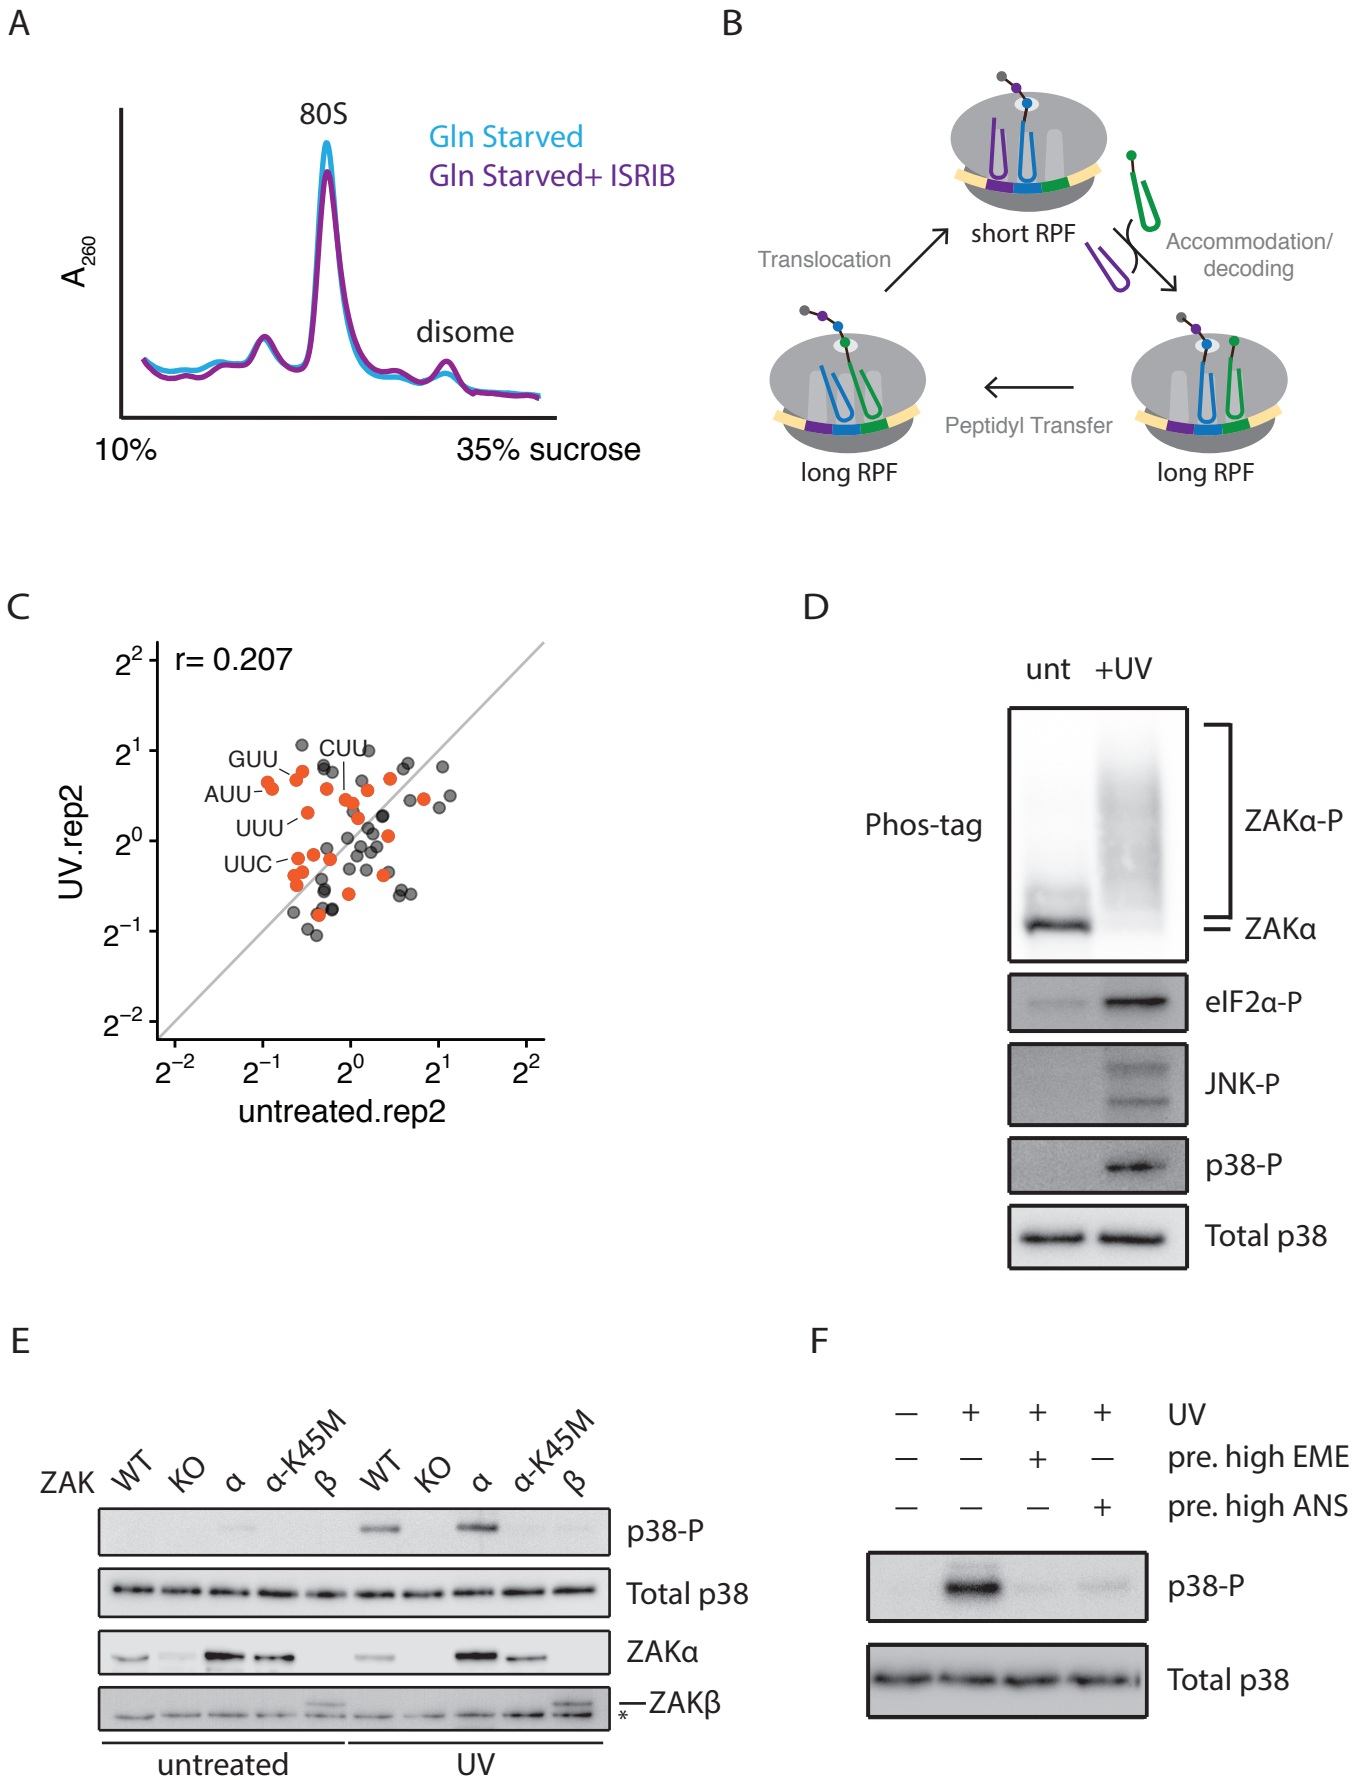

Figure S7

Supplement: NIHMS1602553-supplement-7.pdf [file NIHMS1602553-supplement-7.pdf]
